# Supplementary material for: Postprostatectomy Radiotherapy Timing and Long-Term Health-Related Quality of Life
Source: PubMed Central journal article supplement (PMC11581678; doi:10.1001/jamanetworkopen.2024.40747), 2024-10-24

## Supplementary Online Content

Patel SA, Patil D, Smith J, et al; PROST-QA/RP2 Consortium. Postprostatectomy radiotherapy timing and long-term health-related quality of life. *JAMA Netw Open*. 2024;7(10):e2440747. doi:10.1001/jamanetworkopen.2024.40747

**eTable 1.** PQA and RP2 Consortium Institutions

**eTable 2.** PROSTQA/RP2 Patient Attrition and Interview Completion Rates

**eTable 3.** Factors Associated With Minimally Important Difference by EPIC Domain After Prostatectomy

**eTable 4.** Factors Associated With Changes in the Quality-of-Life Score by EPIC Domain After Post-Prostatectomy Radiotherapy Among Patients Who Received Radiation Only

**eFigure 1.** Kaplan-Meier Plot of Radiation-Free Survival Amongst the Participants Who Went on to Receive Post-Prostatectomy Radiation Therapy

**eFigure 2.** Health-Related Quality of Life Minimally Important Difference Over Time (Higher Score Indicating Greater Decline)

**eFigure 3.** Health-Related Quality of Life Over Time From Baseline Up Until the Receipt of Any Radiation Therapy

**eFigure 4.** Health-Related Quality of Life Over Time Amongst Men Receiving Early Versus Late Post-Prostatectomy Radiation, With Versus Without Androgen Deprivation Therapy

**eFigure 5.** Proportion of Men Free From Urinary Pads Before and After Radiation Amongst Men Receiving Early Versus Late Post-Prostatectomy Radiation Therapy

This supplementary material has been provided by the authors to give readers additional information about their work.

eTable 1: PQA and RP2 Consortium Institutions

| <b><u>PQA (2003-2006)</u></b>                                                                                                                                                                                                                                                                                                                                                                                                                                                                                                                               | <b><u>RP2 (2010-2013)</u></b>                                                                                                                                                                                                                                                                                                                                                                                                                                                                                                                                             |
|-------------------------------------------------------------------------------------------------------------------------------------------------------------------------------------------------------------------------------------------------------------------------------------------------------------------------------------------------------------------------------------------------------------------------------------------------------------------------------------------------------------------------------------------------------------|---------------------------------------------------------------------------------------------------------------------------------------------------------------------------------------------------------------------------------------------------------------------------------------------------------------------------------------------------------------------------------------------------------------------------------------------------------------------------------------------------------------------------------------------------------------------------|
| <ul style="list-style-type: none"> <li>• Beth Israel Deaconess Medical Center (Boston, MA)</li> <li>• Brigham and Women’s Hospital (Boston, MA)</li> <li>• Cleveland Clinic (Cleveland, OH)</li> <li>• Massachusetts General Hospital (Boston, MA)</li> <li>• MD Anderson Cancer Center (Houston, TX)</li> <li>• University of Michigan (Ann Arbor, MI)</li> <li>• Michigan State University (East Lansing, MI)*</li> <li>• University of California-Los Angeles (Los Angeles, CA)</li> <li>• Washington University in St. Louis (St. Louis, MI)</li> </ul> | <ul style="list-style-type: none"> <li>• Beth Israel Deaconess Medical Center (Boston, MA)</li> <li>• Brigham and Women’s Hospital (Boston, MA)</li> <li>• Cleveland Clinic (Cleveland, OH)</li> <li>• Johns Hopkins University (Baltimore, MD)</li> <li>• University of Michigan (Ann Arbor, MI)</li> <li>• Michigan State University (East Lansing, MI)*</li> <li>• University of California-San Francisco (San Francisco, CA)</li> <li>• Vanderbilt University Medical Center (Nashville, TN)</li> <li>• Washington University in St. Louis (St. Louis, MI)</li> </ul> |

\*The Office for Survey Research at Michigan State University administered the third-party phone interviews collecting patient-reported outcome measures for both cohorts

eTable 2: PROSTQA/RP2 Patient Attrition and Interview Completion Rates

| <b>Study Time-point</b> | <b>No. of patients</b> | <b>No. of patients who completed the interview</b> |
|-------------------------|------------------------|----------------------------------------------------|
| Before Treatment        | 1203                   | 1203                                               |
| Follow-up month 2       | 1203                   | 1137                                               |
| Follow-up month 6       | 1191                   | 1122                                               |
| Follow-up month 12      | 1179                   | 1077                                               |
| Follow-up month 24      | 1149                   | 974                                                |
| Follow-up month 36      | 1121                   | 857                                                |
| Follow-up month 48      | 1094                   | 848                                                |
| Follow-up month 60      | 1074                   | 763                                                |
| Follow-up month 72      | 1059                   | 679                                                |
| Follow-up month 84      | 1052                   | 630                                                |
| Follow-up month 96      | 1044                   | 566                                                |
| Follow-up month 108     | 1040                   | 384                                                |
| Follow-up month 120     | 509                    | 283                                                |
| Follow-up month 132     | 504                    | 268                                                |
| Follow-up month 144     | 500                    | 223                                                |
| Follow-up month 156     | 492                    | 213                                                |
| Follow-up month 168     | 468                    | 180                                                |
| Follow-up month 180     | 401                    | 142                                                |

eTable 3: Factors Associated with Minimally Important Difference by EPIC domain after Prostatectomy

| <b>Quality-of-Life Domain</b>            | <b>Independent Variable<sup>a</sup></b>         | <b>P-value<sup>b</sup></b> |
|------------------------------------------|-------------------------------------------------|----------------------------|
| <b>Sexuality</b>                         | Receipt of Pelvic Radiation After Prostatectomy | 0.004 <sup>c</sup>         |
|                                          | Concurrent ADT                                  | 0.92                       |
|                                          | Age                                             | <0.001                     |
|                                          | College Education                               | 0.001                      |
|                                          | Nerve-Sparing Procedure                         | 0.000                      |
|                                          | Pre-RP Sexual Function                          | <0.001                     |
| <b>Urinary incontinence</b>              | Receipt of Pelvic Radiation After Prostatectomy | <0.001 <sup>c</sup>        |
|                                          | Concurrent ADT                                  | 0.76                       |
|                                          | Black race                                      | 0.001                      |
|                                          | Pre-RP Urinary Incontinence                     | <0.001                     |
| <b>Urinary irritation or obstruction</b> | Receipt of Pelvic Radiation After Prostatectomy | <0.001 <sup>c</sup>        |
|                                          | Concurrent ADT                                  | 0.05                       |
|                                          | Black race                                      | 0.04                       |
|                                          | >2 Coexisting illnesses                         | 0.001                      |
|                                          | Nerve-Sparing Procedure                         | 0.001                      |
|                                          | Pre-RP Urinary Irritation                       | <0.001                     |
| <b>Bowel or rectal function</b>          | Receipt of Pelvic Radiation After Prostatectomy | <0.001 <sup>d</sup>        |
|                                          | Concurrent ADT                                  | 0.06                       |
|                                          | Black race                                      | 0.005                      |
|                                          | >2 Coexisting illnesses                         | <0.001                     |
|                                          | Pre-RP Bowel or Rectal Function                 | <0.001                     |
| <b>Vitality or hormonal function</b>     | Receipt of Pelvic Radiation After Prostatectomy | <0.001 <sup>c</sup>        |
|                                          | Concurrent ADT                                  | 0.03                       |
|                                          | Age                                             | 0.03                       |
|                                          | Black race                                      | 0.000                      |
|                                          | >2 Coexisting illnesses                         | <0.001                     |
|                                          | Obesity                                         | 0.003                      |
|                                          | Nerve-Sparing Procedure                         | 0.02                       |
|                                          | Pre-RP Hormonal Function                        | <0.001                     |

a. Multivariable mixed linear model identified factors that were significantly associated with Minimally Important Difference HRQOL over time from baseline (prior to prostatectomy), while starting model adjusting for following covariates before variable selection: Receipt of radiation after prostatectomy (fixed), Concurrent ADT with RT (fixed), Age at the time of prostatectomy, Patient reported race, college graduate (Yes/No), living with partner (Yes/No), Aggressive prostate cancer on biopsy (GS7+), Prostate Volume (mL), Prostate cancer Stage T2 (Yes/No), Number of comorbidities, Obesity, Nerve-sparing radical prostatectomy, Pre-prostatectomy PSA (ng/mL), Pre-prostatectomy Domain score.

b. p-value depicts independent association across all available time-points in multivariable model

c. Pairwise comparison of adjusted difference between early vs late radiation is not significant

d. Pairwise comparison of adjusted difference between early vs late radiation is significant

eTable 4: Factors Associated with Changes in the Quality-of-Life Score by EPIC domain after post-prostatectomy radiotherapy among patients who received radiation only

| <b>Quality-of-Life Domain</b>            | <b>Independent Variable<sup>a</sup></b> | <b>P-value<sup>b</sup></b> |
|------------------------------------------|-----------------------------------------|----------------------------|
| <b>Sexuality</b>                         | Time of Radiation After Prostatectomy   | 0.02                       |
|                                          | Concurrent ADT                          | 0.003                      |
|                                          | Age                                     | <0.001                     |
|                                          | Biopsy Gleason score $\geq 7$           | 0.003                      |
|                                          | Pre-radiation Sexual Function           | <0.001                     |
| <b>Urinary incontinence</b>              | Time of Radiation After Prostatectomy   | 0.003                      |
|                                          | Concurrent ADT                          | 0.09                       |
|                                          | College Education                       | 0.03                       |
|                                          | Living with partner                     | 0.02                       |
|                                          | Obesity                                 | 0.03                       |
| <b>Urinary irritation or obstruction</b> | Time of Radiation After Prostatectomy   | 0.004                      |
|                                          | Concurrent ADT                          | 0.80                       |
| <b>Bowel or rectal function</b>          | Time of Radiation After Prostatectomy   | 0.10                       |
|                                          | Concurrent ADT                          | 0.23                       |
|                                          | >2 Coexisting illnesses                 | 0.02                       |
|                                          | Pre-radiation Bowel or Rectal Function  | <0.001                     |
|                                          | Time of Radiation After Prostatectomy   | 0.09                       |
| <b>Vitality or hormonal function</b>     | Concurrent ADT                          | 0.10                       |
|                                          | Biopsy Gleason score $\geq 7$           | 0.007                      |
|                                          | PSA                                     | 0.01                       |

a. Multivariable mixed linear model identified factors that were significantly associated with changes in HRQOL over time from baseline (nearest visit prior to post-prostatectomy radiotherapy) to end of follow-up, while starting model adjusting for following covariates before variable selection: Time to start of radiation after prostatectomy (fixed), Concurrent ADT with RT (fixed), Age at the time of prostatectomy, Race, College graduate (Yes/No), Living with partner (Yes/No), Aggressive prostate cancer on biopsy (GS7+), Prostate Volume (mL), Prostate cancer Stage T2 (Yes/No), Number of comorbidities, Obesity, Nerve-sparing radical prostatectomy, Pre-prostatectomy PSA (ng/mL), Domain score at baseline as defined above.

b. p-value depicts independent association across all available time-points in multivariable model

eFigure 1: Kaplan-Meier plot of radiation-free survival amongst the participants who went on to receive post-prostatectomy radiation therapy

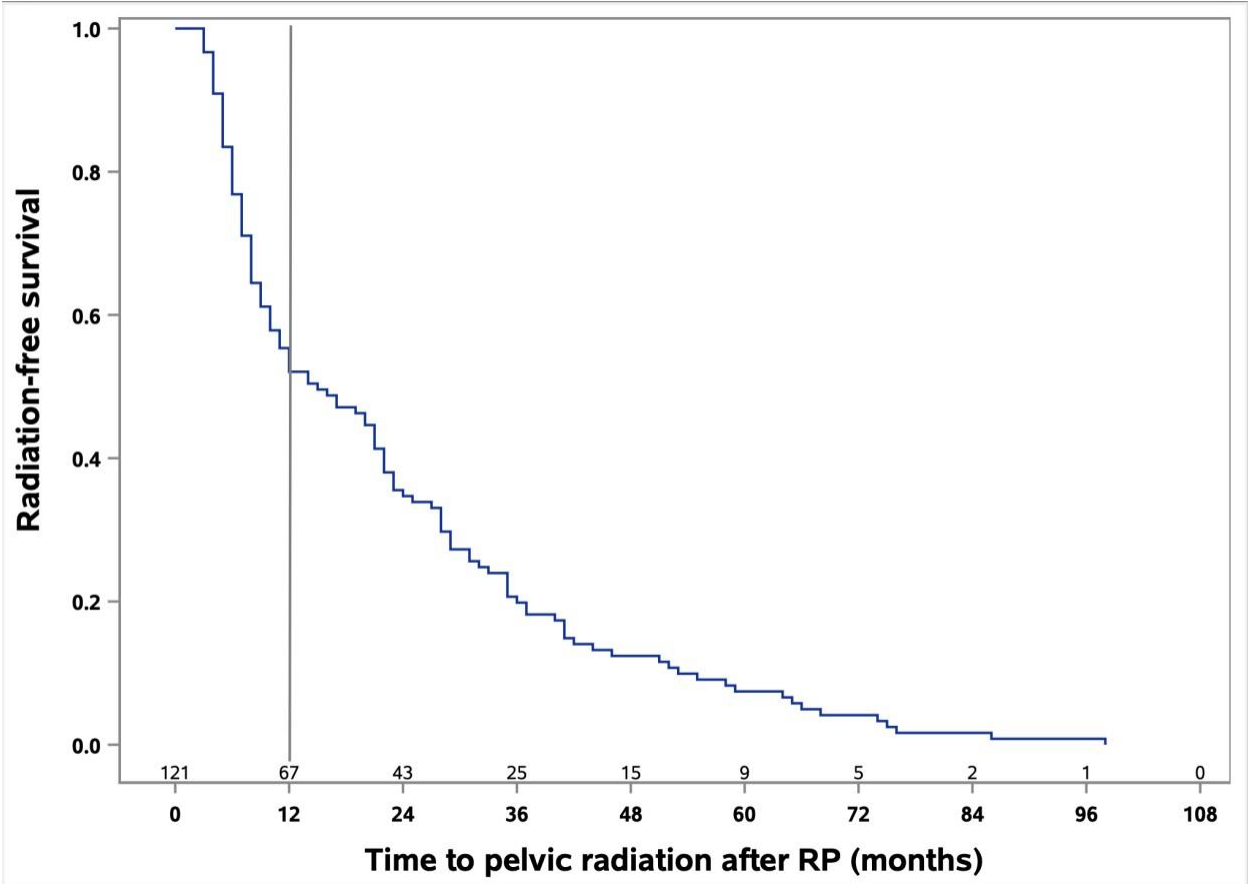

eFigure 2: Health-related quality of life minimally important difference over time (higher score indicating greater decline)

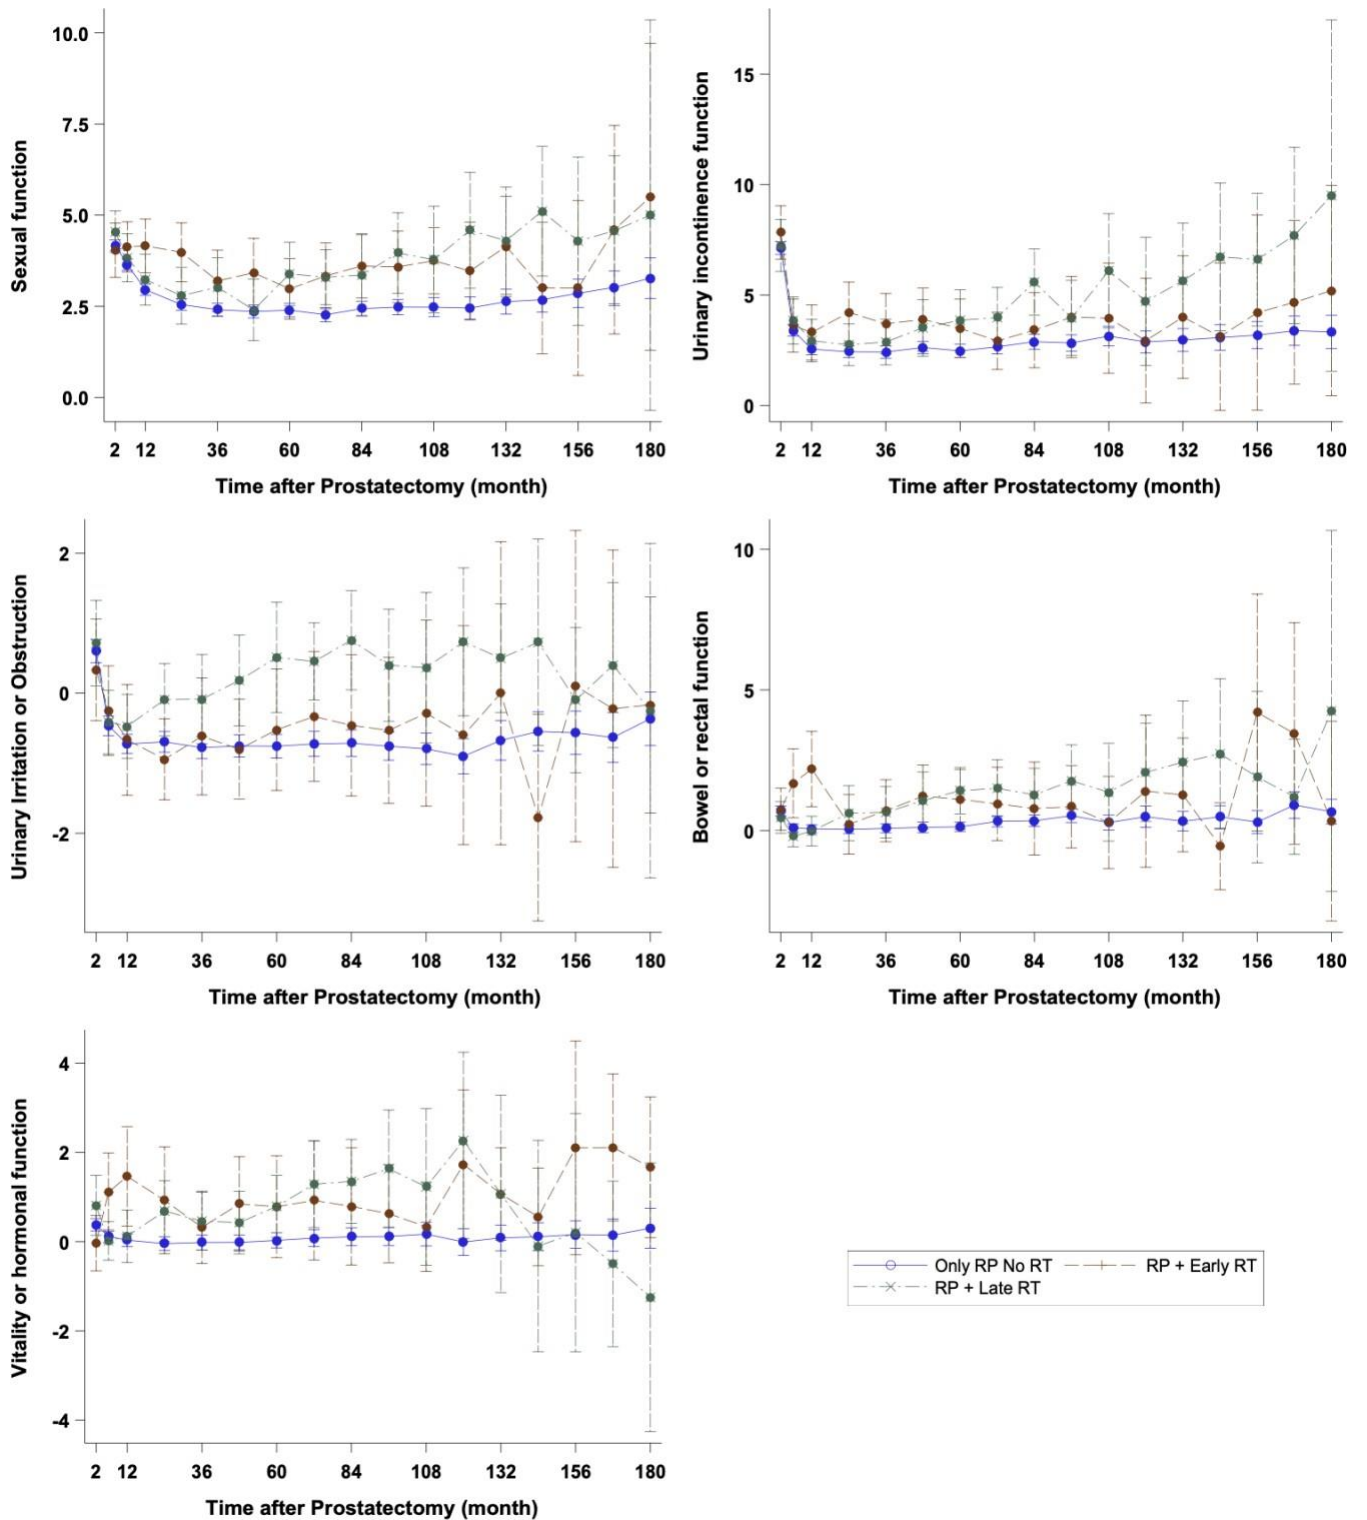

eFigure 3: Health-related quality of life over time from baseline up until the receipt of any radiation therapy

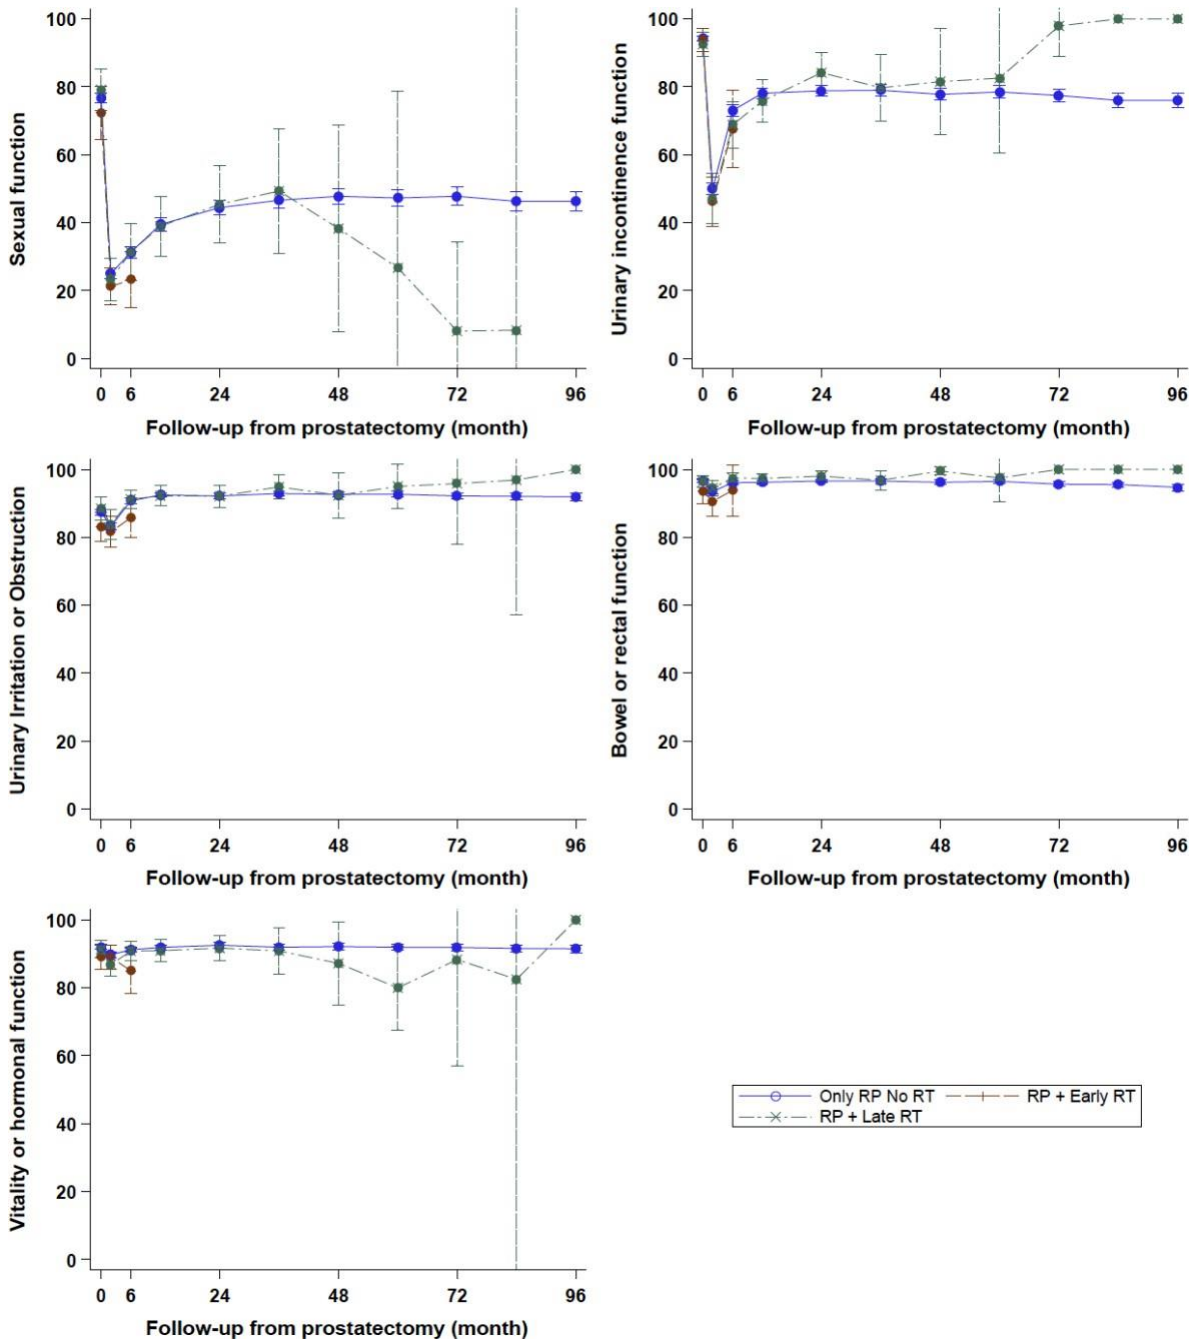



eFigure 4: Health-related quality of life over time amongst men receiving early versus late post-prostatectomy radiation, with versus without androgen deprivation therapy

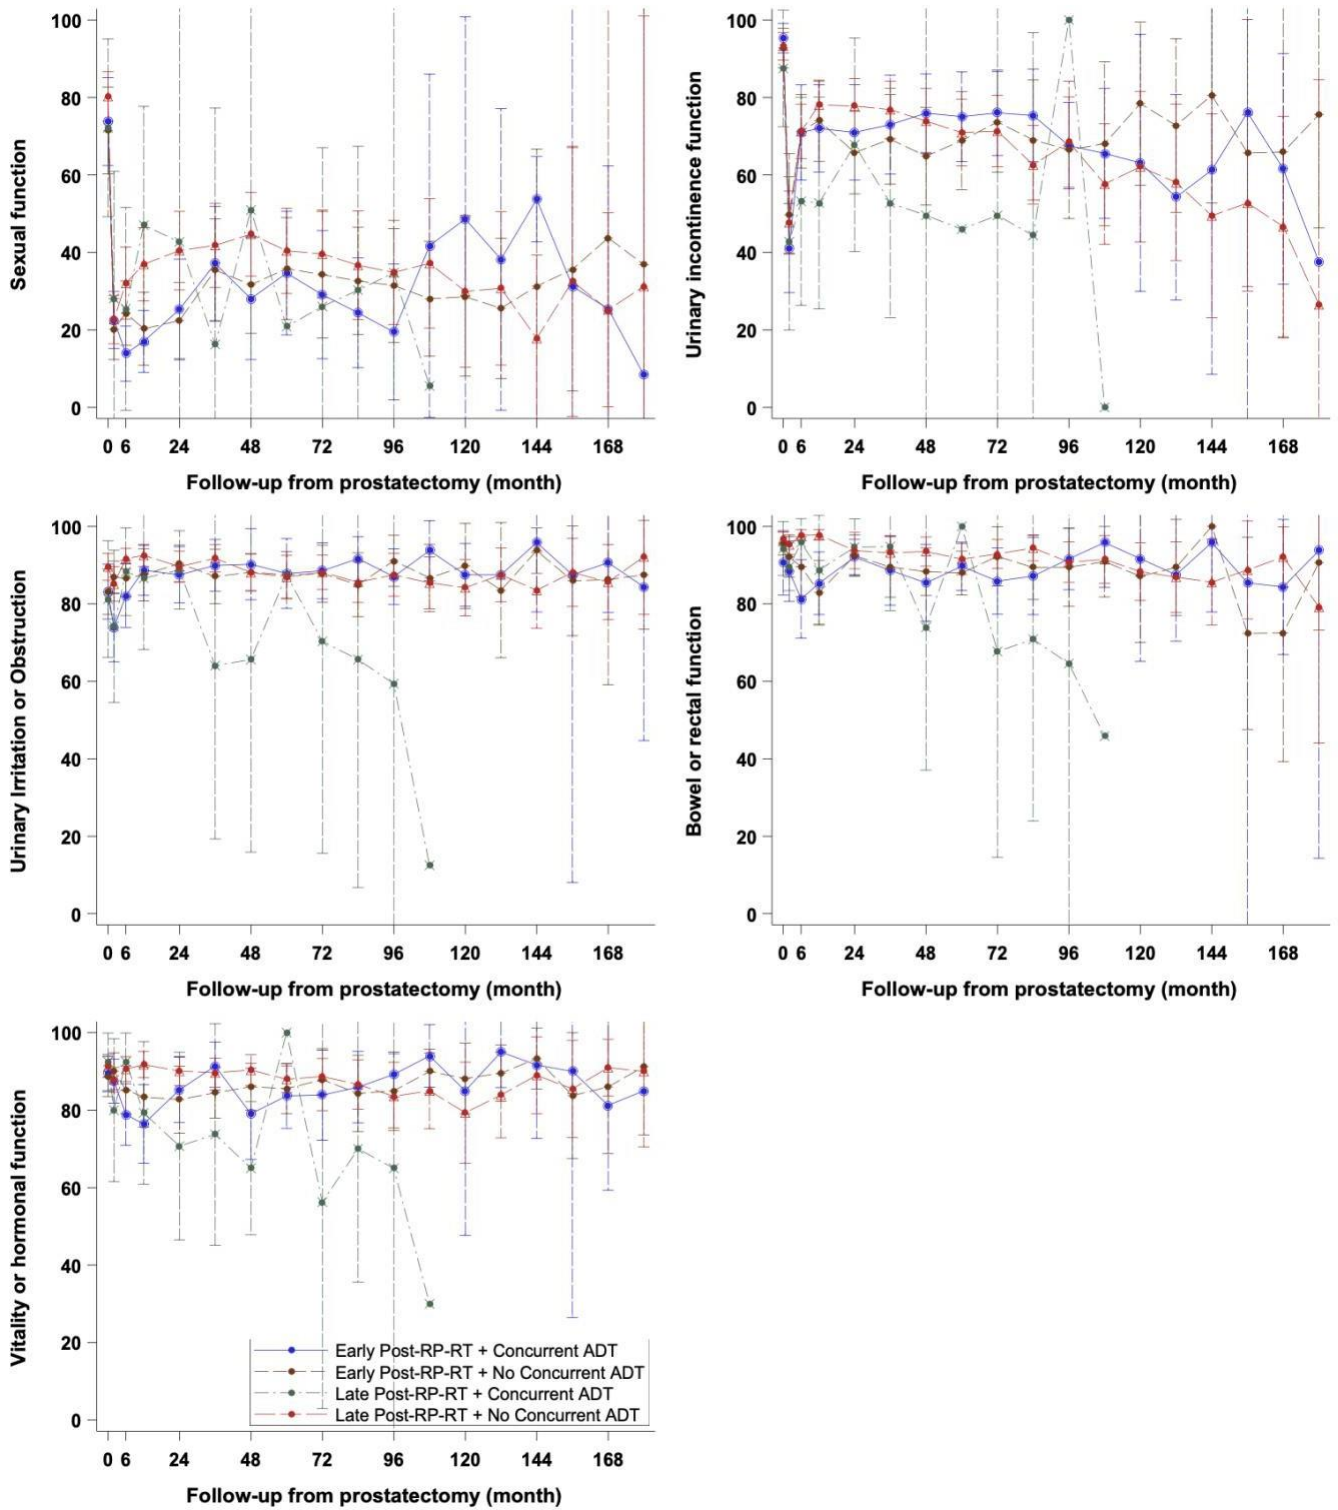

eFigure 5: Proportion of men free from urinary pads before and after radiation amongst men receiving early versus late post-prostatectomy radiation therapy

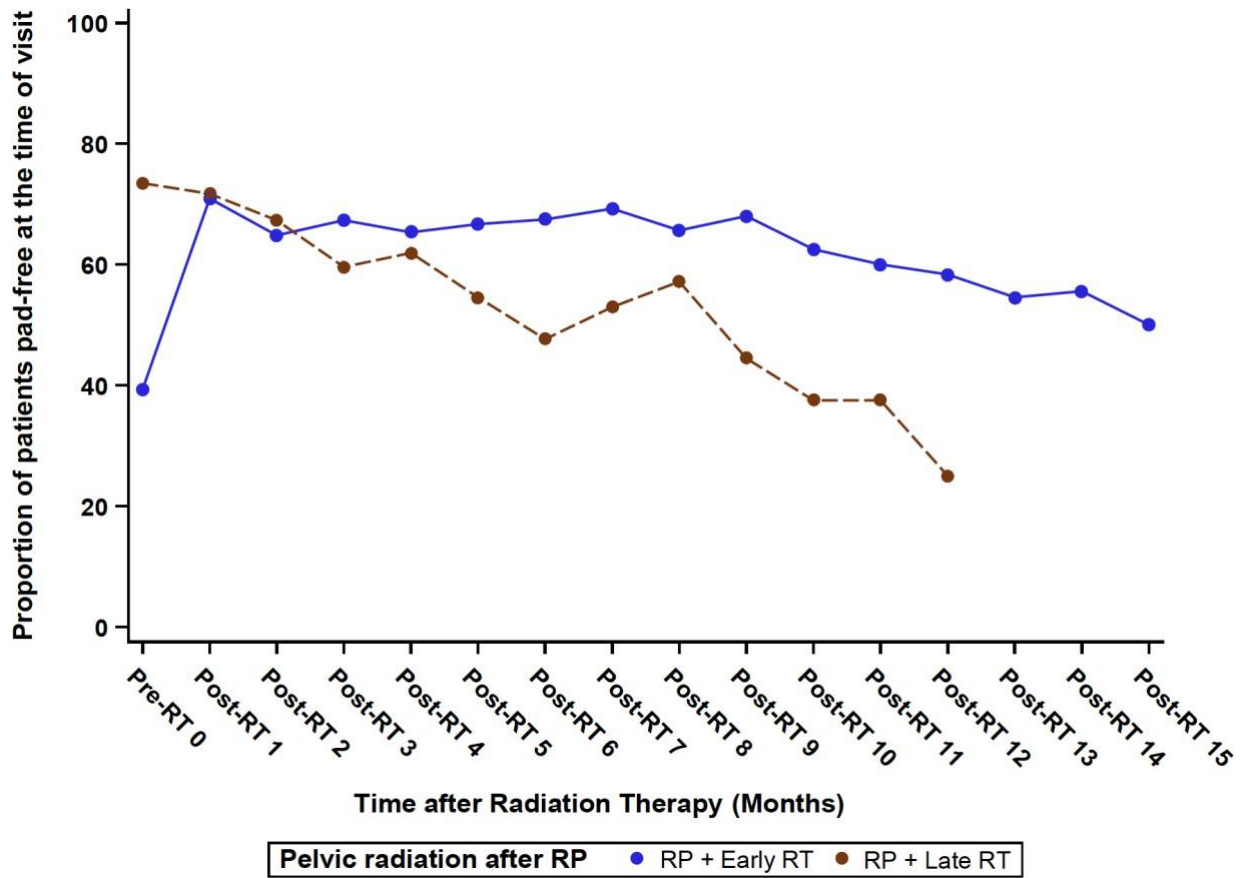

Supplement: jamanetwopen-e2440747-s001.pdf [file jamanetwopen-e2440747-s001.pdf]
