# Supplementary material for: Postprostatectomy Radiotherapy Timing and Long-Term Health-Related Quality of Life
Source: PubMed Central journal article supplement (PMC11581678; doi:10.1001/jamanetworkopen.2024.40747), 2024-10-24
Supplement: jamanetwopen-e2440747-s002.pdf [file jamanetwopen-e2440747-s002.pdf]

Supplemental Online Content: Nonauthor Collaborators

\*First name, last name, and suffix (if applicable) are required and will appear in PubMed.

| <b>*Group Name(s):</b>                   |                   |                              |                  |                                                 |                                          |                                                         |                                                                                            |
|------------------------------------------|-------------------|------------------------------|------------------|-------------------------------------------------|------------------------------------------|---------------------------------------------------------|--------------------------------------------------------------------------------------------|
| <b>*First Name and Middle Initial(s)</b> | <b>*Last Name</b> | <b>*Suffix (eg, Jr, III)</b> | Academic Degrees | Institution                                     | Location (city, state/province, country) | Role or Contribution, eg, chair, principal investigator | Group (if more than 1 Group listed in the byline) and/or Subgroup (eg, Steering Committee) |
| Rodney                                   | Dunn              |                              | MS               | University of Michigan                          | Ann Arbor, MI                            |                                                         |                                                                                            |
| Laurel                                   | Northouse         |                              | PhD, RN          | University of Michigan                          | Ann Arbor, MI                            |                                                         |                                                                                            |
| Thomas                                   | Greenfield        |                              | PhD              | Alcohol Research Group, Public Health Institute | Emeryville, CA                           |                                                         |                                                                                            |
| Jay                                      | Ciezki            |                              | MD               | Cleveland Clinic                                | Cleveland, OH                            |                                                         |                                                                                            |
| Douglas                                  | Dahl              |                              | MD               | Massachusetts General Hospital                  | Boston, MA                               |                                                         |                                                                                            |
| Anthony                                  | Zietman           |                              | MD               | Massachusetts General Hospital                  | Boston, MA                               |                                                         |                                                                                            |
| Felix                                    | Feng              |                              | MD, PhD          | University of California, San Francisco         | San Francisco, CA                        |                                                         |                                                                                            |
| Ted                                      | Skolarus          |                              | MD               | University of Chicago                           | Chicago, IL                              |                                                         |                                                                                            |
| Kyle                                     | Davis             |                              | BS               | Michigan State University                       | East Lansing, MI                         |                                                         |                                                                                            |
| Linda                                    | Stork             |                              | BS               | Michigan State University                       | East Lansing, MI                         |                                                         |                                                                                            |
| Arul                                     | Mahadevan         |                              | MD               | Massachusetts General Hospital                  | Boston, MA                               |                                                         |                                                                                            |
