# Supplementary material for: Postprostatectomy Radiotherapy Timing and Long-Term Health-Related Quality of Life
Source: PubMed Central journal article supplement (PMC11581678; doi:10.1001/jamanetworkopen.2024.40747), 2024-10-24
Supplement: jamanetwopen-e2440747-s003.pdf [file jamanetwopen-e2440747-s003.pdf]

## Data Sharing Statement

Patel. Postprostatectomy Radiotherapy Timing and Long-Term Health-Related Quality of Life. *JAMA Netw Open*. Published October 24, 2024. doi:10.1001/jamanetworkopen.2024.40747

### Data

**Data available:** No
